# Supplementary material for: Nitric oxide release from a biodegradable cysteine-based polyphosphazene
Source: Royal Society of Chemistry journal article supplement (doi:10.1039/c6tb00037a), 2016-01-01
Supplement: c6tb00037a1.pdf [file c6tb00037a1.pdf]

## Nitric oxide release from a biodegradable cysteine-based polyphosphazene

### Electronic Supplementary Information

Alec Lutzke<sup>a</sup>, Bella H. Neufeld<sup>a</sup>, Megan J. Neufeld<sup>a</sup> and Melissa M. Reynolds<sup>\*abc</sup>

<sup>a</sup>Department of Chemistry, <sup>b</sup>School of Biomedical Engineering, and <sup>c</sup>Department of Chemical & Biological Engineering, Colorado State University, Fort Collins, CO 80523, USA.

\*Corresponding author. E-mail: [Melissa.Reynolds@colostate.edu](mailto:Melissa.Reynolds@colostate.edu)

## Table of Contents

|                                                                                                               |   |
|---------------------------------------------------------------------------------------------------------------|---|
| <sup>1</sup> H NMR of trichloro(trimethylsilyl)phosphoranimine .....                                          | 1 |
| <sup>31</sup> P NMR of trichloro(trimethylsilyl)phosphoranimine and poly(dichlorophosphazene).....            | 1 |
| <sup>1</sup> H NMR of ethyl <i>S</i> -methylthiocysteinate hydrochloride .....                                | 2 |
| <sup>1</sup> H NMR of poly(ethyl <i>S</i> -methylthiocysteinyl- <i>co</i> -ethyl cysteinyl phosphazene).....  | 2 |
| <sup>13</sup> C NMR of poly(ethyl <i>S</i> -methylthiocysteinyl- <i>co</i> -ethyl cysteinyl phosphazene)..... | 3 |
| <sup>31</sup> P NMR of poly(ethyl <i>S</i> -methylthiocysteinyl- <i>co</i> -ethyl cysteinyl phosphazene)..... | 3 |
| ATR-FTIR spectrum of poly(ethyl <i>S</i> -methylthiocysteinyl- <i>co</i> -ethyl cysteinyl phosphazene).....   | 4 |
| UV-Vis spectrum of poly(ethyl <i>S</i> -methylthiocysteinyl- <i>co</i> -ethyl cysteinyl phosphazene).....     | 4 |

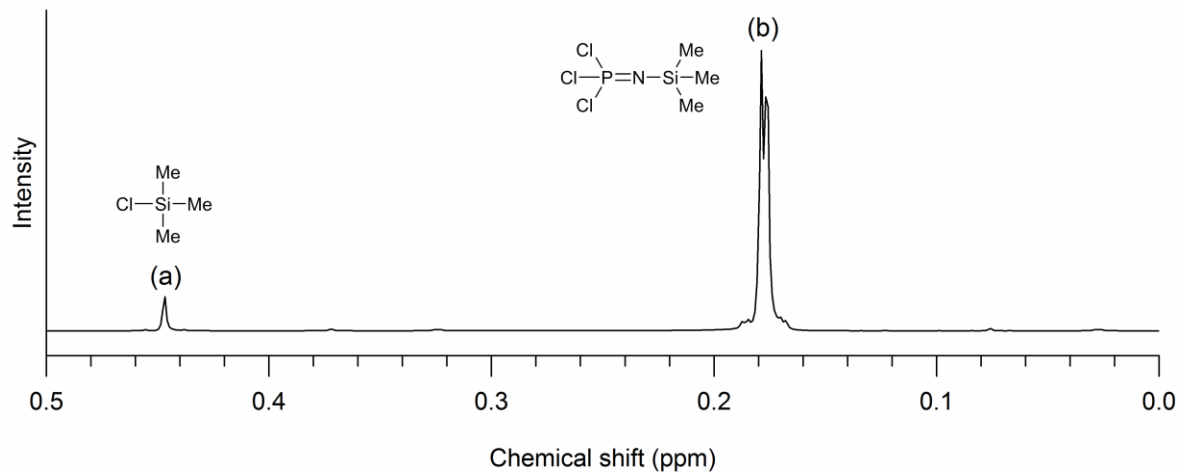

**Figure S1.**  $^1\text{H}$  NMR of trichloro(trimethylsilyl)phosphoranimine.  $^1\text{H}$  NMR  $\delta_{\text{H}}/\text{ppm}$  (400 MHz,  $\text{CDCl}_3$ ): (a) 0.45 ( $\text{Me}_3\text{SiCl}$  impurity, approx. 5%), (b) 0.18 (distorted doublet,  $\text{Cl}_3\text{P}=\text{NSiMe}_3$ ).

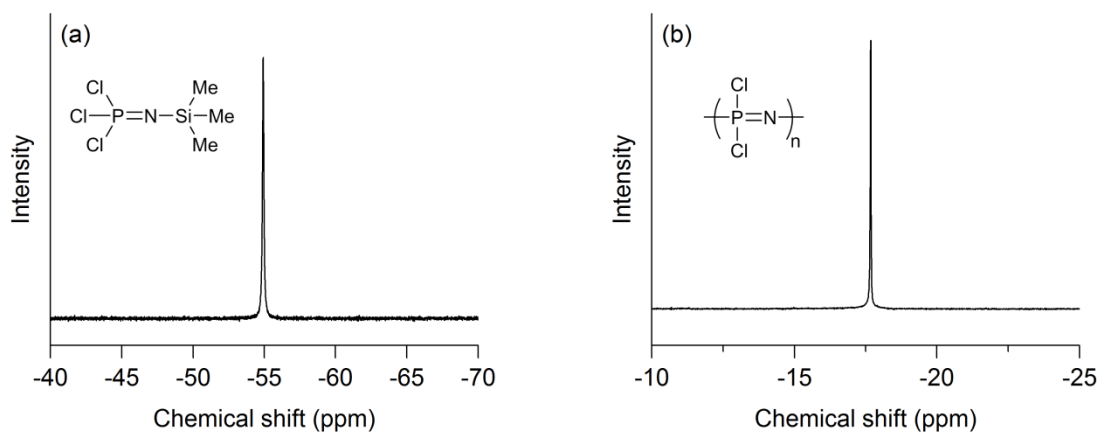

**Figure S2.**  $^{31}\text{P}$  NMR of (a) trichloro(trimethylsilyl)phosphoranimine and (b) poly(dichlorophosphazene).  $^{31}\text{P}$  NMR  $\delta_{\text{P}}/\text{ppm}$  (162 MHz,  $\text{CDCl}_3$ ): (a) -55 ( $\text{Cl}_3\text{P}=\text{NSiMe}_3$ ), (b) -18 ( $-\text{PCl}_2=\text{N}-$ ). Spectra referenced to triphenylphosphine (-6 ppm, not shown).

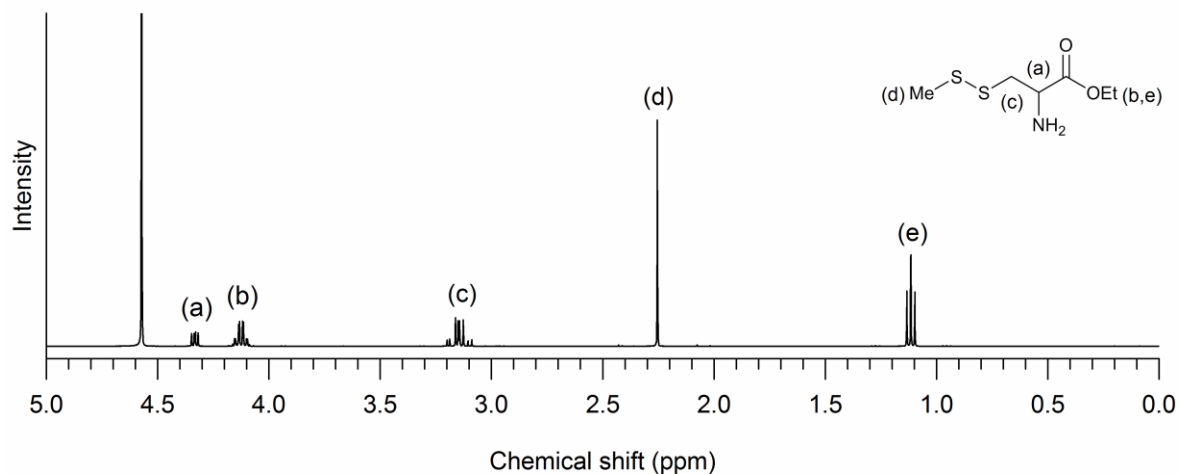

**Figure S3.**  $^1\text{H}$  NMR of ethyl S-methylthiocysteinate.  $^1\text{H}$  NMR  $\delta_{\text{H}}$ /ppm (400 MHz,  $\text{D}_2\text{O}$ ): (a) 4.34 (dd,  $-\text{CH}-$ ), (b) 4.18 – 4.07 (m,  $-\text{OCH}_2-$ ), (c) 3.20 – 3.09 (m,  $-\text{SSCH}_2-$ ), (d) 2.25 (s,  $-\text{SSCH}_3$ ), (e) 1.12 (t,  $-\text{CH}_3$ ). Spectrum referenced to maleic acid (6.2 ppm, not shown).

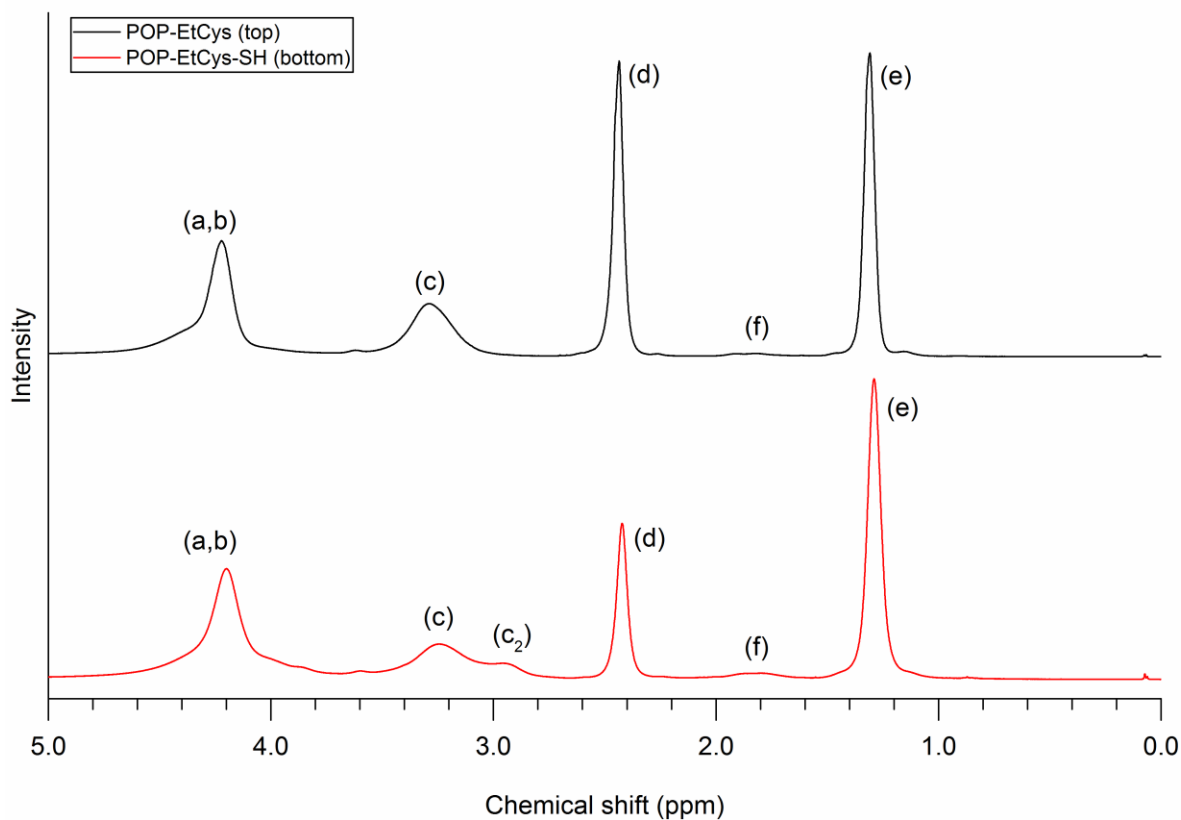

**Figure S4.**  $^1\text{H}$  NMR of poly(bis(ethyl S-methylthiocysteiny)phosphazene) (POP-EtCys) and poly(ethyl S-methylthiocysteiny-co-ethyl cysteiny) phosphazene (POP-EtCys-SH).  $^1\text{H}$  NMR  $\delta_{\text{H}}$ /ppm (400 MHz,  $\text{CDCl}_3$ ): (a,b) 4.6 – 4.0 ( $-\text{CH}-$ ,  $-\text{OCH}_2-$ ), (c) 3.29 ( $-\text{SSCH}_2-$ ), ( $c_2$ ) 2.95 ( $-\text{SCH}_2-$ ), (d) 2.43 ( $-\text{SSCH}_3$ ), (e) 1.31 ( $-\text{CH}_3$ ), (f) 1.83 ( $-\text{SH}$ ). Concentration:  $20 \text{ mg mL}^{-1}$ .

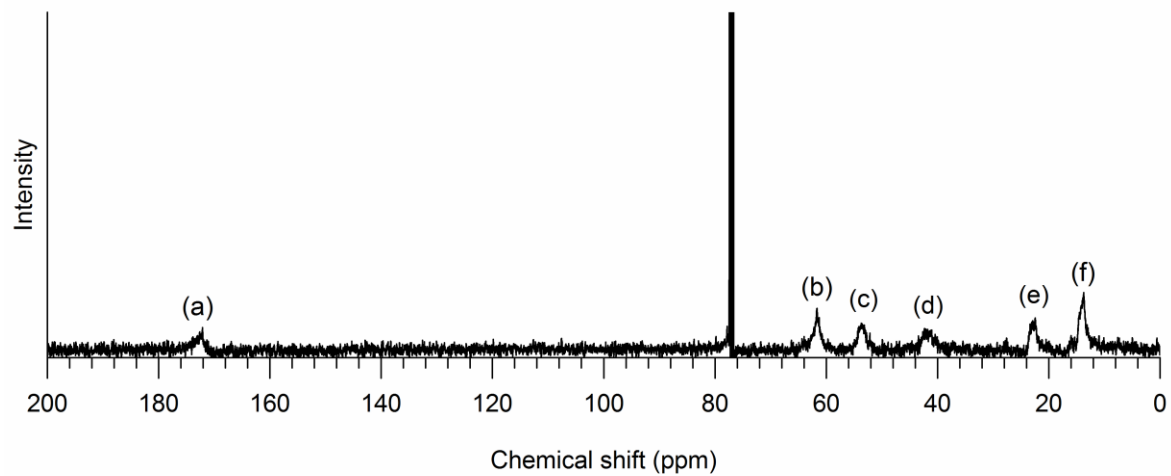

**Figure S5.**  $^{13}\text{C}$  NMR of poly(ethyl *S*-methylthiocysteiny-co-ethyl cysteiny phosphazene) (POP-EtCys-SH).  $^{13}\text{C}$  NMR  $\delta_{\text{C}}$ /ppm (100 MHz,  $\text{CDCl}_3$ ): (a) 173 (- $\text{CO}_2^-$ ), (b) 61 (- $\text{OCH}_2^-$ ), (c) 54 (- $\text{CH}^-$ ), (d) 43 (- $\text{SSCH}_2^-$ ), (e) 23 (- $\text{SSCH}_3$ ), (f) 14 (- $\text{CH}_3$ ). Concentration: 200 mg  $\text{mL}^{-1}$ .

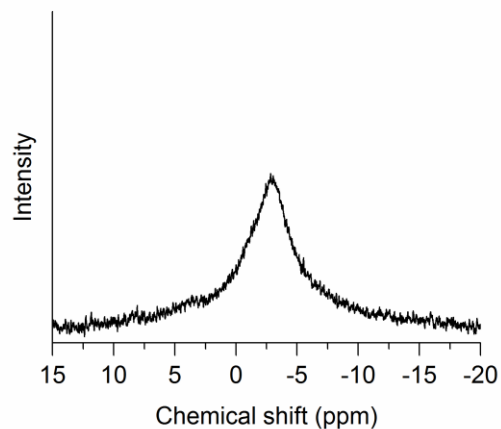

**Figure S6.**  $^{31}\text{P}$  NMR of poly(ethyl *S*-methylthiocysteiny-co-ethyl cysteiny phosphazene) (POP-EtCys-SH).  $^{31}\text{P}$  NMR  $\delta_{\text{P}}$ /ppm (162 MHz,  $\text{CDCl}_3$ ): -2.6. Spectrum referenced to triphenylphosphine (-6 ppm, not shown) to determine central value, then reacquired in the absence of a reference to avoid peak overlap. Concentration: 200 mg  $\text{mL}^{-1}$ .

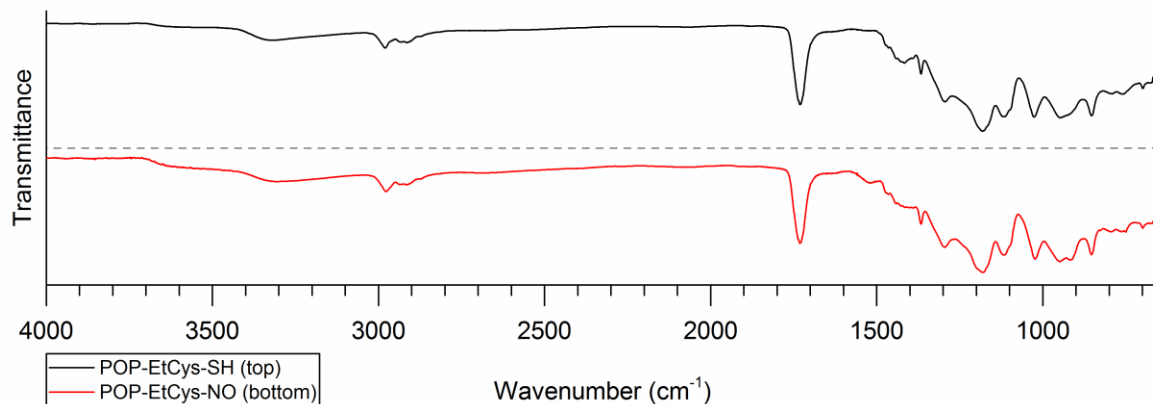

**Figure S7.** ATR-FTIR spectra of poly(ethyl *S*-methylthiocysteiny-co-ethyl cysteiny phosphazene) (POP-EtCys-SH) (top), and the *S*-nitrosated derivative (POP-EtCys-NO) (bottom). POP-EtCys-SH: IR  $\nu_{\max}/\text{cm}^{-1}$ : 3320, 2980, 2914, 1732, 1417, 1367, 1295, 1180, 1117, 1026, 948, 853, 792, 760, 698. POP-EtCys-NO: IR  $\nu_{\max}/\text{cm}^{-1}$ : 3300, 2977, 2915, 1732, 1520, 1367, 1296, 1180, 1117, 1024, 950, 920, 853, 794, 763, 750, 699.

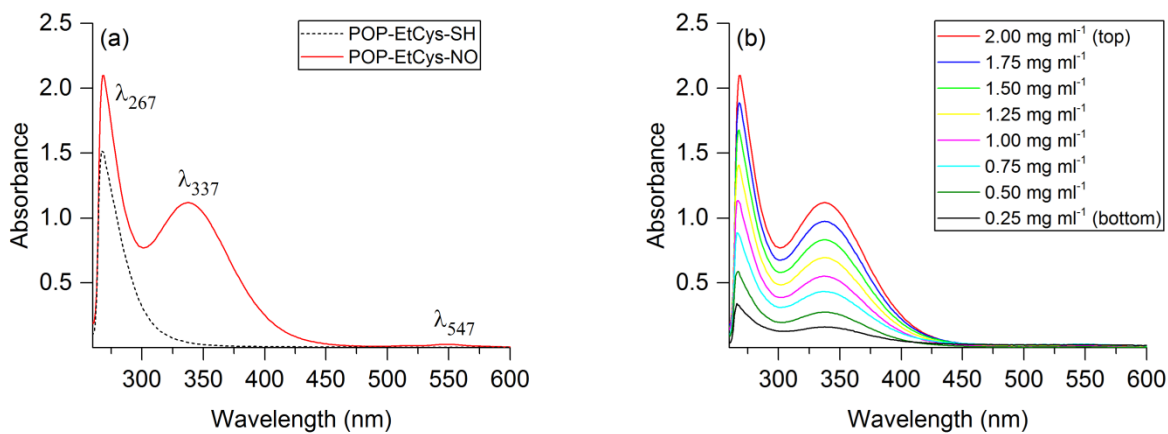

**Figure S8.** UV-Vis spectra of poly(ethyl *S*-methylthiocysteiny-co-ethyl cysteiny phosphazene) (POP-EtCys-SH) and the *S*-nitrosated derivative (POP-EtCys-NO) in DMF. The characteristic absorbances associated with the successful formation of primary *S*-nitrosothiols are shown in (a), while (b) illustrates the relationship between polymer concentration and the prominent absorbance at 337 nm that is often attributed to a  $\pi \rightarrow \pi^*$  transition.
